# Supplementary material for: Addressing the role of triphenylphosphine in copper catalyzed ATRP
Source: Royal Society of Chemistry journal article supplement (doi:10.1039/c8py01245h), 2018-01-01
Supplement: c8py01245h1.pdf [file c8py01245h1.pdf]

## Supporting Information

### Addressing the role of triphenylphosphine in copper catalyzed ATRP

João R. C. Costa<sup>1,§</sup>, Joana R. Góis<sup>1,§</sup>, Francesco De Bon<sup>2</sup>, Arménio C. Serra<sup>1</sup>, Tamaz Guliashvili<sup>1</sup>, Abdirisak A. Isse<sup>2</sup>, Armando Gennaro<sup>2</sup>, Jorge F. J. Coelho<sup>1\*</sup>

<sup>1</sup> Centre for Mechanical Engineering Materials and Processes (CEMMPRE), Department of Chemical Engineering, University of Coimbra, 3030-790 Coimbra, Portugal

<sup>2</sup> Department of Chemical Sciences, University of Padova, Via Marzolo 1, 35131 Padova, Italy

§: Both authors contributed equally to this work.

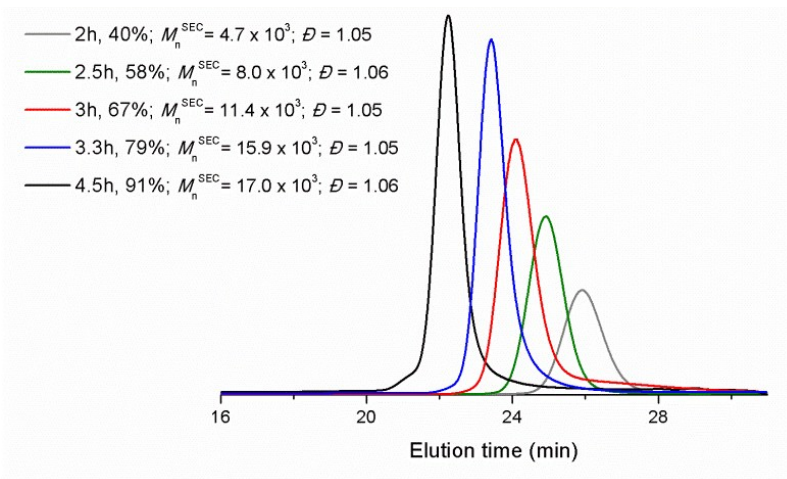

**Figure S1:** SEC traces with conversion for the SARA ATRP of MA mediated by PPh<sub>3</sub> in DMSO/H<sub>2</sub>O = 90/10 (v/v) at 50 °C. Reaction conditions: [MA]<sub>0</sub>/[solvent] = 2/1 (v/v); [MA]<sub>0</sub>/[EBiB]<sub>0</sub>/[PPh<sub>3</sub>]<sub>0</sub>/ [Cu<sup>II</sup>Br<sub>2</sub>]<sub>0</sub>/ [Me<sub>6</sub>TREN]<sub>0</sub> = 222/1/1/0.1/1.1.

**Table S1:** SARA ATRP of MA mediated by PPh<sub>3</sub> in DMSO (or DMSO/H<sub>2</sub>O = 90/10 (v/v)), using different [PPh<sub>3</sub>]<sub>0</sub>/[CuBr<sub>2</sub>]<sub>0</sub>/[Me<sub>6</sub>TREN]<sub>0</sub> ratios <sup>a</sup>.

| entry | solvent               | initiator | <i>T</i> (°C) | [PPh <sub>3</sub> ] <sub>0</sub> /[Cu <sup>II</sup> Br <sub>2</sub> ] <sub>0</sub> / [Me <sub>6</sub> TREN] <sub>0</sub> | time (h) | conv (%) | <i>k<sub>p</sub></i> <sup>app</sup> (h <sup>-1</sup> ) | <i>M<sub>n</sub></i> <sup>th</sup> × 10 <sup>-3</sup> | <i>M<sub>n</sub></i> <sup>SEC</sup> × 10 <sup>-3</sup> | <i>D</i> |
|-------|-----------------------|-----------|---------------|--------------------------------------------------------------------------------------------------------------------------|----------|----------|--------------------------------------------------------|-------------------------------------------------------|--------------------------------------------------------|----------|
| 1     | Acetonitrile          | EBiB      | 30            | 1/0.1/1.1                                                                                                                | 24       | 10       | ---                                                    | 1.90                                                  | 2.10                                                   | 1.16     |
| 2     | DMF                   | EBiB      | 50            | 1/0.1/1.1                                                                                                                | 24       | 30       | ---                                                    | 5.7                                                   | 6.9                                                    | 1.05     |
| 3     | Ethanol               | EBiB      | 50            | 1/0.1/1.1                                                                                                                | 9        | 96       | ---                                                    | 18.6                                                  | 23.4                                                   | 1.28     |
| 4     | DMSO/H <sub>2</sub> O | EBiB      | 50            | 1/0.1/1.1                                                                                                                | 4.5      | 91       | 0.761                                                  | 16.4                                                  | 16.96                                                  | 1.06     |
| 5     | DMSO/H <sub>2</sub> O | EBPA      | 50            | 1/0.1/1.1                                                                                                                | 15       | 82       | ---                                                    | 14.8                                                  | 38.8                                                   | 1.08     |
| 6     | DMSO/H <sub>2</sub> O | EBiB      | 50            | 1/0.1/0.2                                                                                                                | 24       | 90       | ---                                                    | 15.78                                                 | 16.75                                                  | 1.07     |
| 7     | DMSO/H <sub>2</sub> O | EBPA      | 50            | 1/0.1/0.2                                                                                                                | 24       | 76       | ---                                                    | 14.5                                                  | 21.62                                                  | 1.02     |

<sup>a</sup> Conditions: [MA]<sub>0</sub>/[solvent] = 2/1 (v/v); [initiator]<sub>0</sub>/[MA]<sub>0</sub> = 1/210.

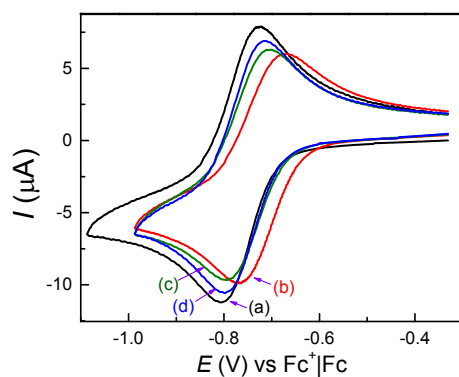

**Figure S2:** Cyclic voltammetry of [BrCu<sup>II</sup>Me<sub>6</sub>TREN]<sup>+</sup> in DMSO + 0.1 M Et<sub>4</sub>NBF<sub>4</sub> at 50 °C, recorded on GC electrode at 0.2 V/s: (a) 1.0 mM [BrCu<sup>II</sup>Me<sub>6</sub>TREN]<sup>+</sup>; (b) as (a) + 1 mM PPh<sub>3</sub>; (c) as (b) + 10 mM Et<sub>4</sub>NBr; (d) as (b) + 100 mM Et<sub>4</sub>NBr.

**Table S2:** SEC parameters over time, determined by multidetector calibration, for the SARA ATRP of MA mediated by PPh<sub>3</sub> in DMSO/H<sub>2</sub>O = 90/10 (v/v) at 50 °C. Reaction conditions: [MA]<sub>0</sub>/[solvent] = 2/1 (v/v); [MA]<sub>0</sub>/[EBiB]<sub>0</sub>/[PPh<sub>3</sub>]<sub>0</sub>/ [Cu<sup>II</sup>Br<sub>2</sub>]<sub>0</sub>/ [Me<sub>6</sub>TREN]<sub>0</sub>= 210/1/1/0.1/1.1.

| Reaction in the presence of light |                            |                   | Reaction in the dark       |                   |
|-----------------------------------|----------------------------|-------------------|----------------------------|-------------------|
| Time (h)                          | $M_n^{SEC} \times 10^{-3}$ | $\mathcal{D}$     | $M_n^{SEC} \times 10^{-3}$ | $\mathcal{D}$     |
| 1.50                              | 2.66 <sup>a</sup>          | 1.03 <sup>a</sup> | 2.50 <sup>a</sup>          | 1.11 <sup>a</sup> |
| 2.00                              | 6.01                       | 1.08              | 5.28                       | 1.11              |
| 2.50                              | 10.03                      | 1.05              | 9.04                       | 1.06              |
| 3.00                              | 13.64                      | 1.05              | 12.47                      | 1.04              |
| 3.50                              | 17.07                      | 1.09              | 15.43                      | 1.10              |
| 4.00                              | 19.78                      | 1.08              | 19.27                      | 1.10              |

<sup>a</sup> determined by universal calibration.

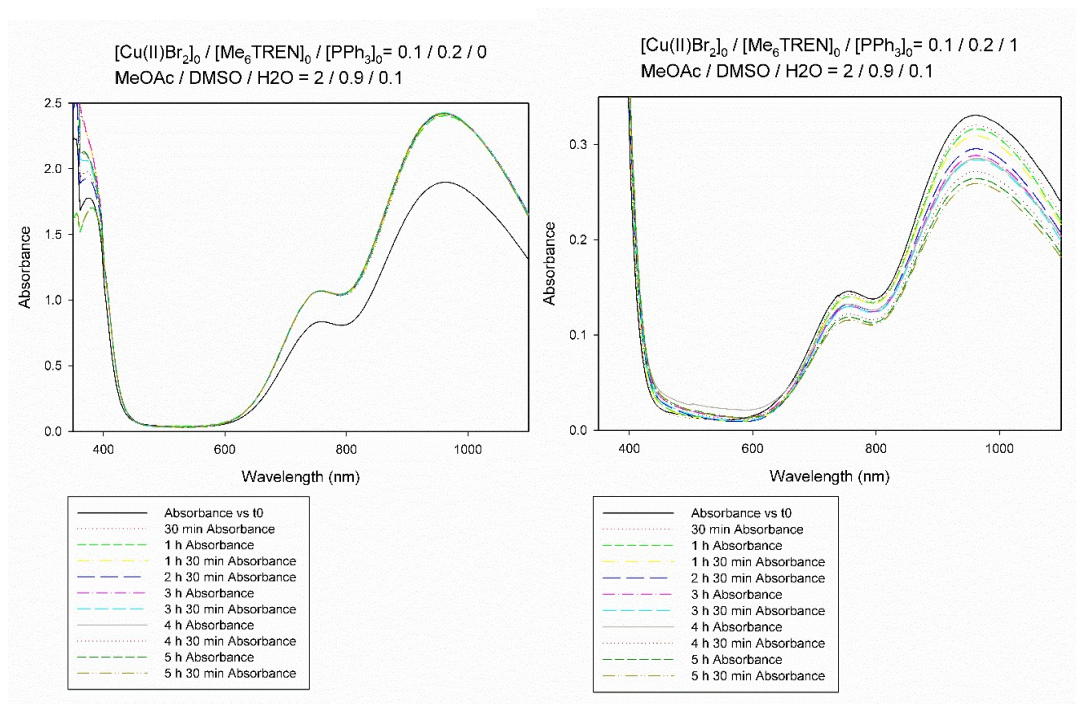

**Figure S3:** UV-Vis spectra of Cu<sup>II</sup>Br<sub>2</sub>/Me<sub>6</sub>TREN in a MeOAc/DMSO/H<sub>2</sub>O = 2/0.9/0.1 (v/v/v) mixture at 50 °C in the absence and in the presence of PPh<sub>3</sub>. Conditions: [CuBr<sub>2</sub>]<sub>0</sub>/[Me<sub>6</sub>TREN]<sub>0</sub>/[PPh<sub>3</sub>]<sub>0</sub> = 0.1/0.2/0 (molar ratio), [Cu<sup>II</sup>Br<sub>2</sub>]<sub>0</sub> = 3.35 m (left); and [CuBr<sub>2</sub>]<sub>0</sub>/[Me<sub>6</sub>TREN]<sub>0</sub>/[PPh<sub>3</sub>]<sub>0</sub> = 0.1/0.2/1 (molar ratio), [Cu<sup>II</sup>Br<sub>2</sub>]<sub>0</sub> = 3.35 m (right).

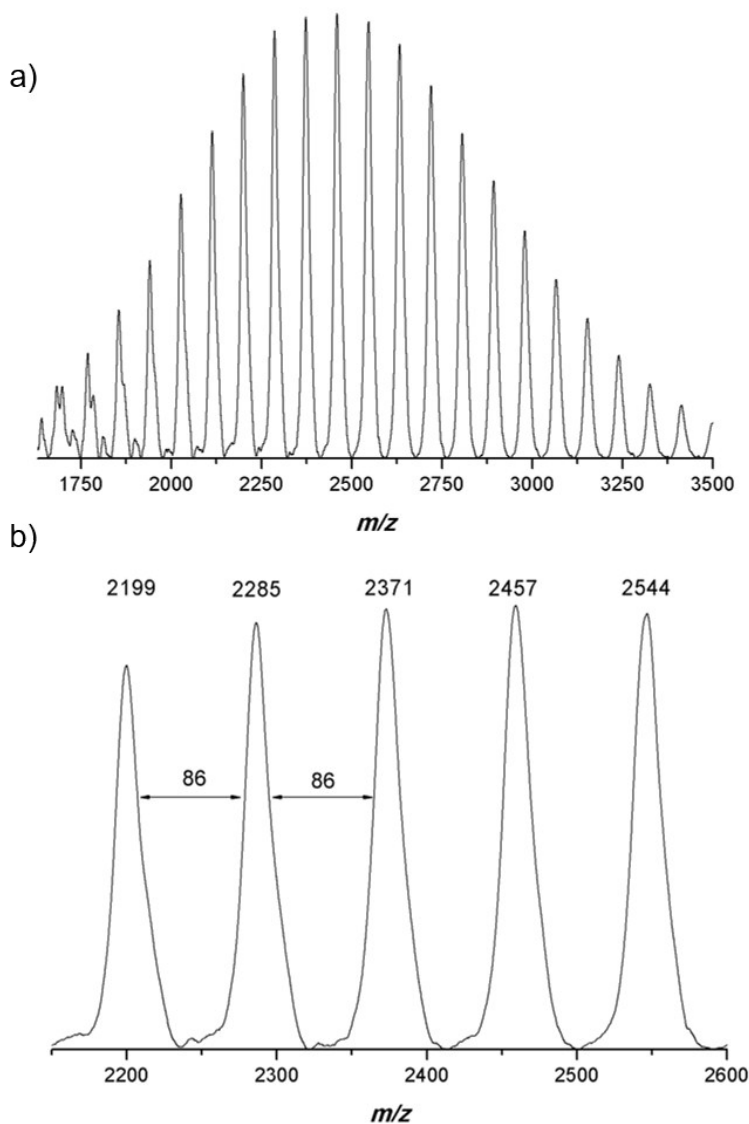

**Figure S4:** MALDI-TOF-MS in the linear mode (using HABA as matrix) a) from  $m/z$  1600 to 3500 and b) enlargement of the spectrum from  $m/z$  2150 to 3600 of PMA-Br ( $M_n^{SEC} = 2.5 \times 10^3$ ;  $D = 1.02$ ).

**Table S3:** MALDI-TOF MS peaks assignment.

| <b>n</b> | <b>MW<sub>th</sub><sup>a</sup></b> | <b>MW<sub>exp</sub> (Figure S3)</b> |
|----------|------------------------------------|-------------------------------------|
| 23       | 2198                               | 2199                                |
| 24       | 2284                               | 2285                                |
| 25       | 2371                               | 2371                                |
| 26       | 2457                               | 2457                                |
| 27       | 2543                               | 2544                                |

<sup>a</sup>  $MW_{th} = M(\text{EBiB}) + n \times M(\text{MA}) + M(\text{Na}^+)$
